# Supplementary material for: DNA Damage in Circulating Hematopoietic Progenitor Stem Cells as Promising Biological Sensor of Frailty
Source: PubMed Central journal article supplement — J Gerontol A Biol Sci Med Sci. 2022 Feb 9;77(7):1279–86. doi: 10.1093/gerona/glac034 (PMC9255693; doi:10.1093/gerona/glac034), 2022-02-09

## **Supplemental Material**

**eTable1**

**eTable2**

**eFigure1**

**eFigure2**

**eFigure3**

**eFigure4**

**eTable 1. Hematological parameters of fresh blood.** Blood collected in the study groups of Table 1 according to the frail, pre-frail, non-frail status and in a group of 46 young.

|                                                                            | <b>Frail<br/>n=40</b>     | <b>Pre-frail<br/>n=13</b> | <b>Non-frail<br/>n=32</b> | <b>Young<br/>n=46</b>  | <b>p<sup>a</sup></b> | <b>p<sup>b</sup></b> | <b>p<sup>c</sup></b> |
|----------------------------------------------------------------------------|---------------------------|---------------------------|---------------------------|------------------------|----------------------|----------------------|----------------------|
| <b>Hemoglobin</b> <sup>de</sup><br>g/dL                                    | 11.1 ± 1.6                | 12.9 ± 1.3                | 14.1 ± 1.0                | 14.7±1.3               | <.004                | <.001                | <.005                |
| <b>White blood cells</b> <sup>d</sup><br>n/μL                              | 6919±2002                 | 6440±2309                 | 6350±1213                 | 5901±1282              | NS                   | NS                   | NS                   |
| <b>Lymphocytes</b> <sup>f</sup><br>n/μL<br>(%)                             | 1654 ± 658<br>(24.0±12.0) | 1898 ± 696<br>(29.5±12.4) | 2314 ± 508<br>(35.7±5.3)  | 1908±536<br>(32.5±6.6) | <.002                | NS                   | NS                   |
| <b>Granulocytes</b> %                                                      |                           |                           |                           |                        |                      |                      |                      |
| Neutrophils                                                                | 58.6±15.5                 | 58.4±12.6                 | 52.6±7.1                  | 55.0±6.4               | NS                   | NS                   | NS                   |
| Eosinophils                                                                | 3.2±2.7                   | 3.3±1.1                   | 3.1±1.2                   | 2.9±1.6                | NS                   | NS                   | NS                   |
| Basophils                                                                  | 0.6±0.5                   | 0.8±0.7                   | 0.5±0.4                   | 0.8±0.3                | NS                   | NS                   | NS                   |
| <b>Monocytes</b><br>%                                                      | 10.2±6.5                  | 8.3±2.1                   | 7.8±1.6                   | 8.8±1.9                | NS                   | NS                   | NS                   |
| <b>eHPSC Lin1-/CD45+/CD34+</b><br>on PBMC of fresh blood <sup>§</sup><br>% | 0.040±0.01                | N.A.                      | 0.071±0.06                | 0.062±0.03             |                      | NS                   |                      |

Notes. Values are expressed as mean + SD. Significant differences in the comparison with young subjects are reported below when positive.

<sup>a</sup> comparison between pre-frail vs. frail.

<sup>b</sup> comparison between non-frail vs. frail.

<sup>c</sup> comparison between non-frail vs. pre-frail

<sup>d</sup> comparison between frail vs. young. \*p < 0.05

<sup>e</sup> comparison between pre-frail vs. young. \*p < 0.05

<sup>f</sup> comparison between non-frail vs. young. \*p < 0.05

<sup>§</sup>Data obtained in randomly chosen frail (5 samples), non-frail (4 samples), young (5 samples).

N.A., not available

**eTable 2. Description of chronic diseases and classes of drugs.** Study groups of

Table 1 according to the frail, pre-frail, non-frail status.

|                                       | <b>Frail</b> | <b>Pre-frail</b> | <b>Non-frail</b> |
|---------------------------------------|--------------|------------------|------------------|
| <b>Chronic diseases. n (%)</b>        |              |                  |                  |
| Hypertension                          | 30 (70)      | 10 (76.9)        | 19 (59.4)        |
| Diabetes mellitus                     | 16 (40)      | 2 (15.4)         | 1 (3.1)          |
| Dyslipidemia                          | 12 (30)      | 3 (23.1)         | 12 (37.5)        |
| Ischemic heart disease                | 11 (27.5)    | 2 (15.4)         | 3 (9.4)          |
| Cerebrovascular disease               | 10 (25)      | 1 (7.7)          | 0 (0.0)          |
| Renal insufficiency                   | 10 (25)      | 2 (15.4)         | 1 (3.1)          |
| Heart failure                         | 8 (20)       | 1 (7.7)          | 0 (0.0)          |
| Obstructive respiratory disease       | 8 (20)       | 1 (7.7)          | 0 (0.0)          |
| Peripheral vascular disease           | 8 (20)       | 0 (0.0)          | 3 (9.4)          |
| Epilepsy                              | 3 (7.5)      | 0 (0.0)          | 1 (3.1)          |
| Solid tumor                           | 3 (7.5)      | 1 (7.7)          | 0 (0.0)          |
| Rheumatic disease                     | 3 (7.5)      | 2 (15.4)         | 0 (0.0)          |
| Gastrointestinal disease              | 2 (5)        | 2 (15.4)         | 2 (6.3)          |
| Asthma                                | 1 (2.5)      | 0 (0.0)          | 2 (6.3)          |
| Leukemia                              | 1 (2.5)      | 0 (0.0)          | 0 (0.0)          |
| <b>Classes of drugs. n (%)</b>        |              |                  |                  |
| Antihypertensives                     | 33 (82.5)    | 11 (84.6)        | 21 (65.6)        |
| Proton-pump inhibitors                | 24 (60.0)    | 6 (46.2)         | 7 (21.9)         |
| Oral antidiabetic agents              | 12 (30)      | 2 (15.4)         | 1 (3.1)          |
| Statins                               | 12 (30)      | 6 (46.2)         | 11 (34.4)        |
| Folic acid supplements                | 10 (25)      | 1 (7.7)          | 1 (3.1)          |
| Antiepileptic drugs                   | 3 (7.5)      | 0 (0.0)          | 1 (3.1)          |
| Vitamin D supplements                 | 7 (17.5)     | 0 (0.0)          | 0 (0.0)          |
| Calcium supplements                   | 5 (12.5)     | 1 (7.7)          | 0 (0.0)          |
| Bisphosphonates                       | 1 (2.5)      | 0 (0.0)          | 0 (0.0)          |
| Antiarrhythmics                       | 11 (27.5)    | 4 (30.8)         | 1 (3.1)          |
| Oral anticoagulants                   | 15 (37.5)    | 1 (7.7)          | 2 (6.3)          |
| Antiplatelet agents                   | 19 (47.5)    | 4 (30.8)         | 5 (15.6)         |
| Benzodiazepines                       | 7 (17.5)     | 0 (0.0)          | 2 (6.3)          |
| Antipsychotics                        | 6 (15)       | 1 (7.7)          | 0 (0.0)          |
| Opioids                               | 3 (7.5)      | 0 (0.0)          | 0 (0.0)          |
| Non steroidal anti-inflammatory drugs | 0 (0.0)      | 1 (7.7)          | 0 (0.0)          |
| Corticosteroids                       | 6 (15)       | 1 (7.7)          | 1 (3.1)          |
| Drugs for the genitourinary system    | 8 (20)       | 2 (15.4)         | 3 (9.4)          |
| Antidepressants                       | 5 (12.5)     | 0 (0.0)          | 3 (9.4)          |
| Respiratory medications               | 7 (17.5)     | 2 (15.4)         | 2 (6.3)          |

**eFigure 1. Gating strategy of flow cytometry.** Gating strategy of flow cytometry for the analysis of PBMC isolated by Ficoll-Paque sedimentation and the respective CD31+, CD14+ and CD34+/CD3-/CD14- cell subpopulations.  $\gamma$ -H2AX positive cells are also indicated. CD3 indicate the T lymphocytes, CD14 the monocytes and CD34 the cHPSCs within CD3-/CD14- cells.  $\gamma$ -H2AX was evaluated as a marker of DNA damage. SSC: side scatter. FSC: forward scatter.

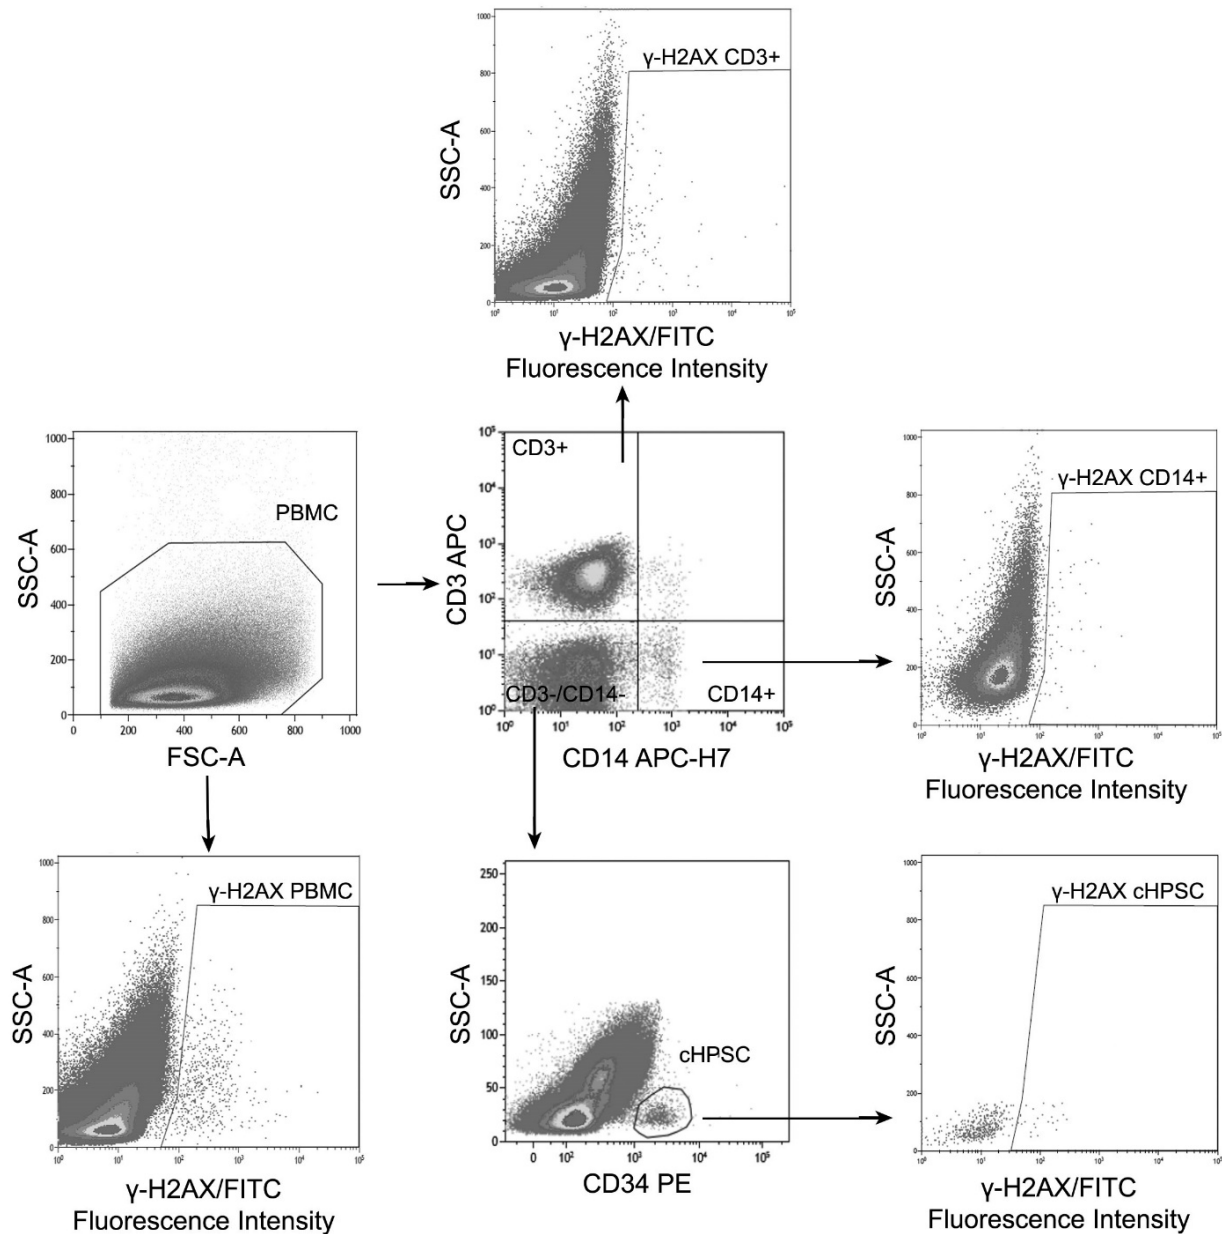

**Figure 2. Gating strategy of flow cytometry.** Gating strategy of flow cytometry for the analysis of cHPSC CD45+/Lin1-/CD34+ in mononucleated cells (PBMC) of fresh whole blood. SSC: side scatter. FSC: forward scatter.

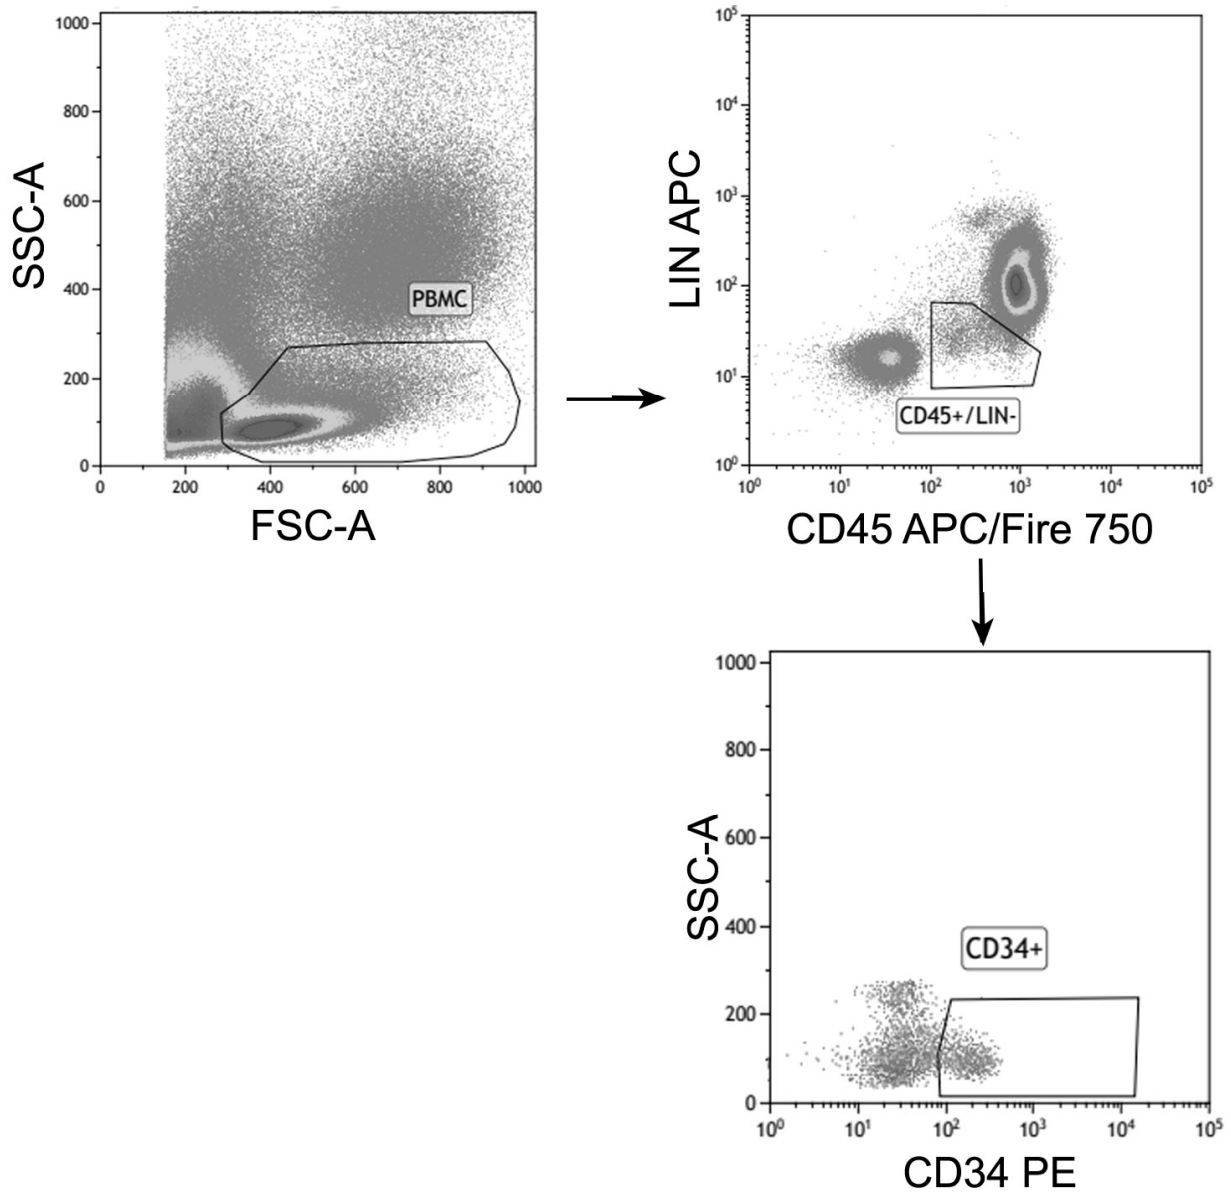

**Figure 3. Receiver-operating characteristics (ROC) curve.** Evaluation of the comparison of percentage of DNA damaged cHPSC of 40 frail versus 32 non-frail subjects (left) and versus 13 pre-frail subjects (right). The area under the curve (AUC) and the 95% confidence interval (CI) are reported.

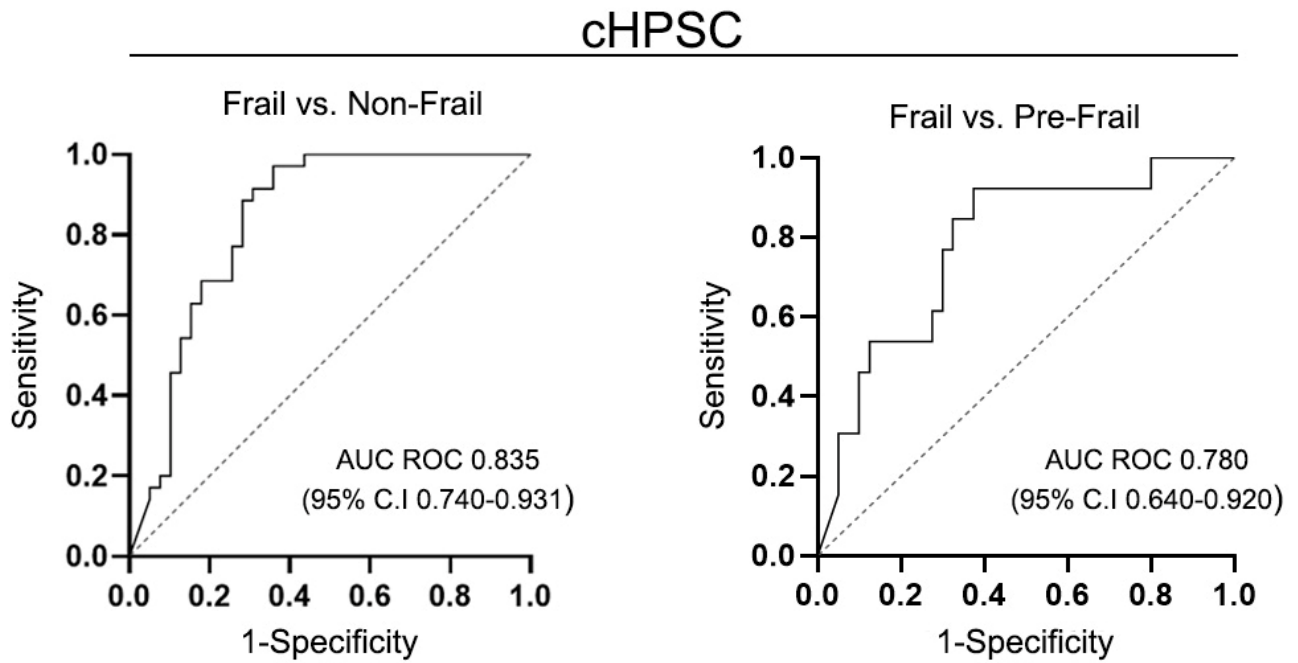

**Figure 4. Representation of oxidative stress evaluated in plasma.**  $5\alpha,6\alpha$ -epoxycholesterol ( $5\alpha,6\alpha$ EC), left;  $3\beta,5\alpha,6\beta$ -3OH-cholesterol (triol) ( $3\beta,5\alpha,6\beta$ -3OHC), right;  $5\beta,6\beta$ -epoxycholesterol ( $5\beta,6\beta$ EC), bottom. The level of the oxysterols has been evaluated in 17 frail, 9 pre-frail, 18 non-frail, 10 young samples. \*  $p < 0.01$ . Data expressed as means  $\pm$  SD.

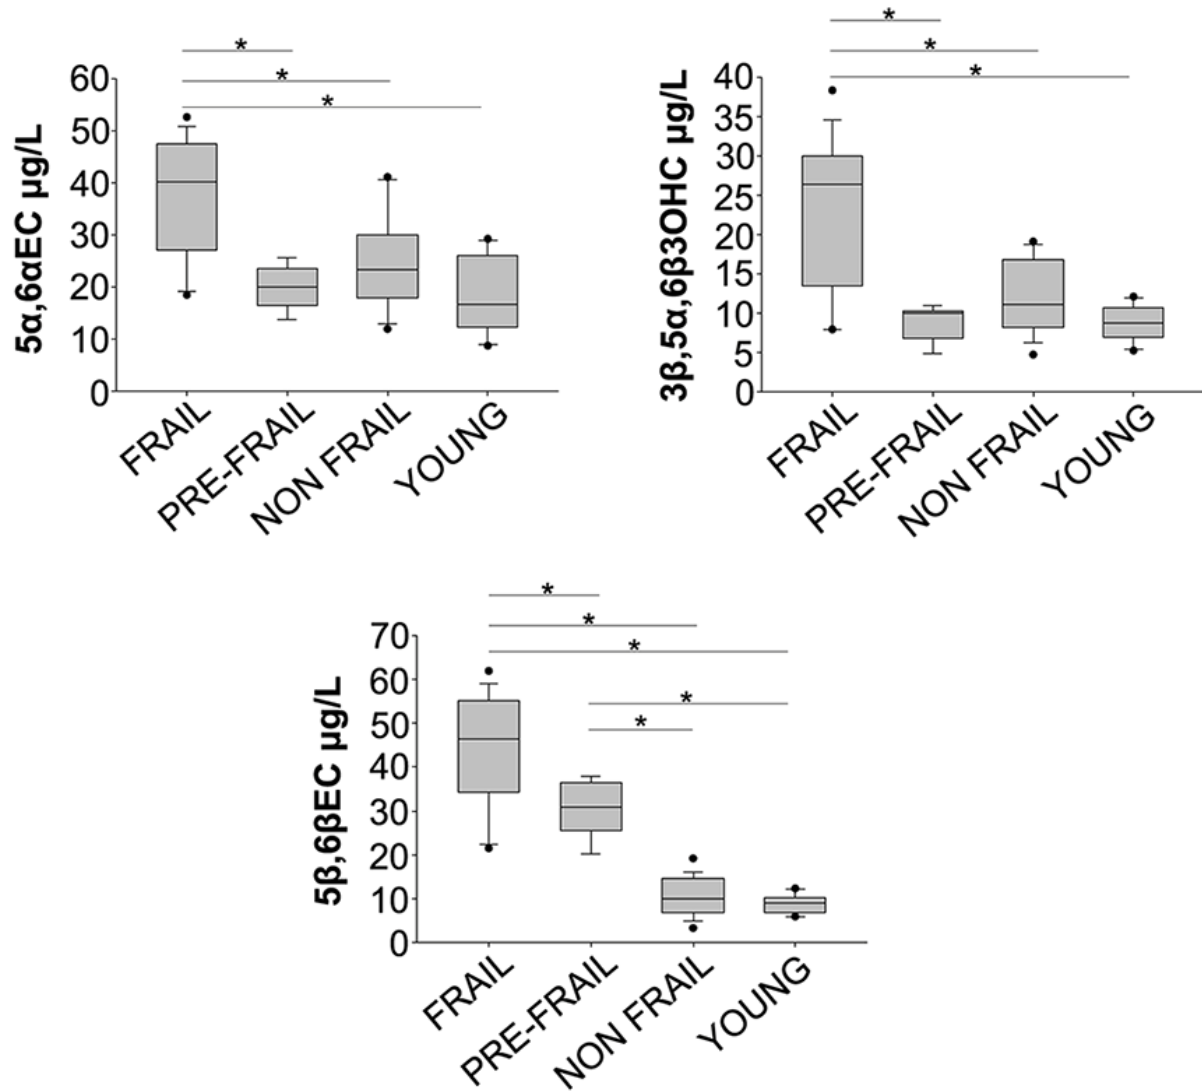

Supplement: glac034_suppl_supplementary_material.pdf [file glac034_suppl_supplementary_material.pdf]
